# Supplementary material
Source: publisher figshare collection journal article supplement (https://tandf.figshare.com/ndownloader/files/21814176)
Supplement: Supplementary file 1 [file 21814176]

**Appendix:**

Table A1. PM mass composition (mg/m3) obtained by Anderson 8-stage for clustering analysis.

| Particle size | 2017/  10/16 | 2017/  10/28 | 2017/  11/6 | 2017/  11/12 | 2017/  11/19 | 2017/  12/3 | 2017/  12/10 | 2017/  12/17 | 2017/  12/24 | 2017/  12/31 | 2018/  1/7 | 2018/  1/15 | 2018/  1/22 | Average |
| --- | --- | --- | --- | --- | --- | --- | --- | --- | --- | --- | --- | --- | --- | --- |
| 9 | 0.4107 | 0.3907 | 0.4582 | 0.2998 | 0.4331 | 0.4778 | 0.6392 | 0.6094 | 0.6027 | 0.5560 | 0.7196 | 0.8274 | 0.5434 | 0.4909 |
| 5.8 | 0.1941 | 0.1809 | 0.2244 | 0.1660 | 0.2117 | 0.2048 | 0.2477 | 0.2551 | 0.2604 | 0.2623 | 0.2914 | 0.3134 | 0.2751 | 0.2228 |
| 4.7 | 0.0733 | 0.1001 | 0.1215 | 0.0714 | 0.3181 | 0.1195 | 0.1427 | 0.1325 | 0.1323 | 0.1232 | 0.1468 | 0.1604 | 0.1606 | 0.1316 |
| 3.3 | 0.0566 | 0.0566 | 0.1017 | 0.0805 | 0.1020 | 0.0961 | 0.1136 | 0.1329 | 0.1223 | 0.1337 | 0.1539 | 0.1888 | 0.1690 | 0.1036 |
| 2.1 | 0.0307 | 0.0313 | 0.0545 | 0.0446 | 0.0578 | 0.0472 | 0.0599 | 0.0636 | 0.0705 | 0.0782 | 0.0845 | 0.1133 | 0.0961 | 0.0551 |
| 1.1 | 0.0085 | 0.0093 | 0.0399 | 0.0153 | 0.0258 | 0.0159 | 0.0178 | 0.0189 | 0.0191 | 0.0298 | 0.0288 | 0.0412 | 0.0309 | 0.0205 |
| 0.7 | 0.0022 | 0.0026 | 0.0401 | 0.0052 | 0.0113 | 0.0025 | 0.0029 | 0.0022 | 0.0028 | 0.0105 | 0.0050 | 0.0061 | 0.0032 | 0.0076 |
| 0.4 | 0.0029 | 0.0038 | 0.0382 | 0.0090 | 0.0191 | 0.0013 | 0.0004 | 0.0011 | 0.0041 | 0.0009 | 0.0072 | 0.0078 | 0.0005 | 0.0089 |
| 0.01 | 0.0039 | 0.0055 | 0.0123 | 0.0064 | 0.0097 | 0.0020 | 0.0027 | 0.0031 | 0.0043 | 0.0109 | 0.0050 | 0.0145 | 0.0044 | 0.0091 |
